# Supplementary material
Source: PubMed Central journal article supplement (PMC4080552)
Supplement: SD4.pdf [file SD4.pdf]

SUPPLEMENTAL TABLE 1  
Prevalence of circulating dengue virus serotypes, Sri Lanka\*

| Serotype | DENV serotype exposure before initiation of study, no. (%)† | DENV serotype exposure during study year, no. (%)‡ |
|----------|-------------------------------------------------------------|----------------------------------------------------|
| DENV1    | 7 (9)                                                       | 7(21)                                              |
| DENV2    | 32(43)                                                      | 16(49)                                             |
| DENV3    | 27(36)                                                      | 9(27)                                              |
| DENV4    | 9(12)                                                       | 1(3)                                               |
| Total    | 75(100)                                                     | 33(100)                                            |

\*DENV = dengue virus.

†A person immune to dengue was considered to have been previously exposed to a particular serotype if the person had neutralizing antibodies to one serotype only (monotypic) at baseline. Inferences of infecting serotype were not made when more than one serotype was neutralized.

‡Based on children who were exposed to primary infections during the study year. The serotype was determined by polymerase chain reaction or neutralization test performed with sample collected at the end of the study (follow-up).
